# Supplementary material
Source: PubMed Central journal article supplement (PMC3976272)

Copy number step size distribution

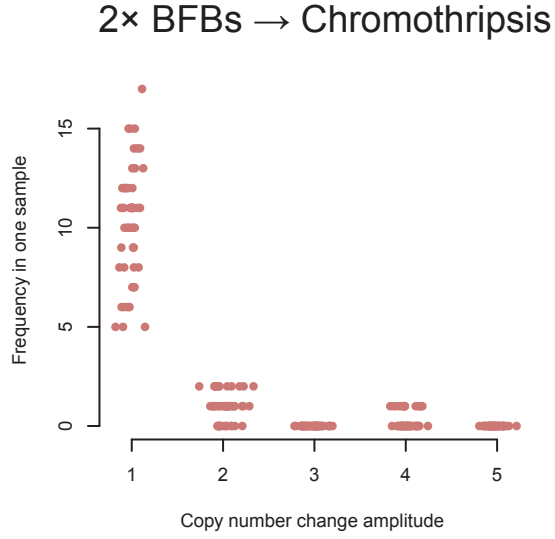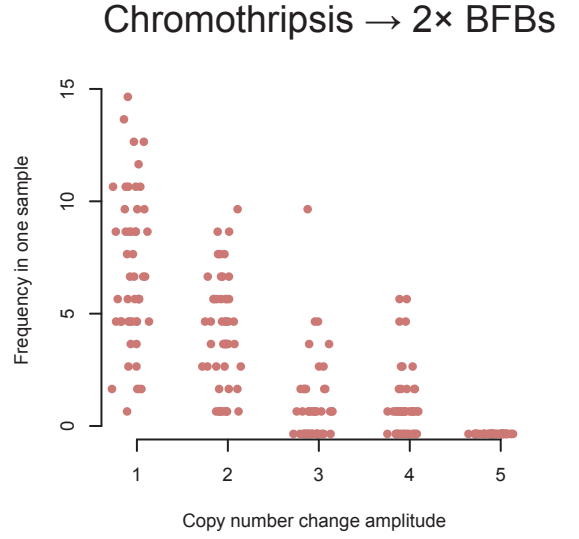

Copy number jump size distribution

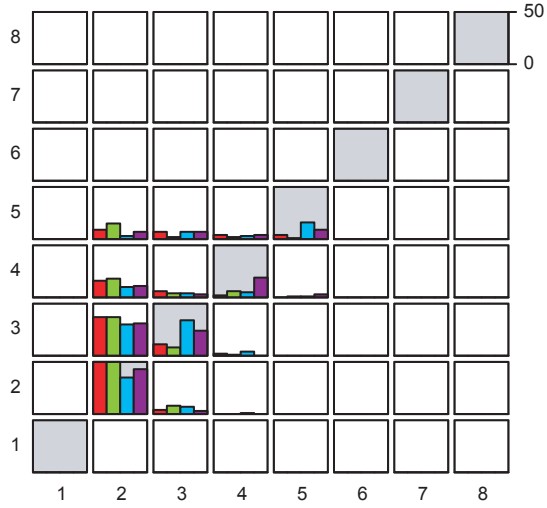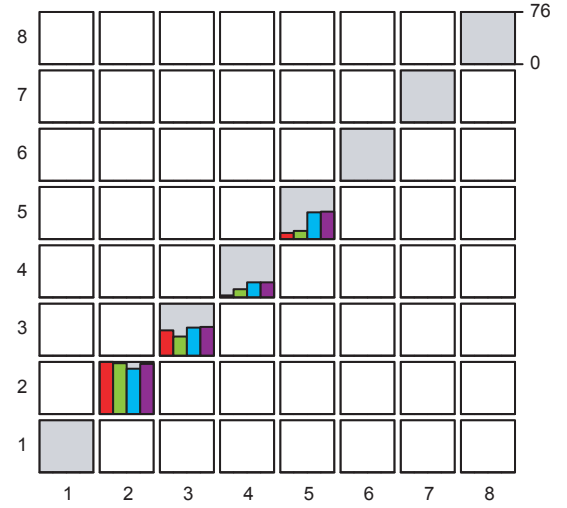

Copy number trajectory

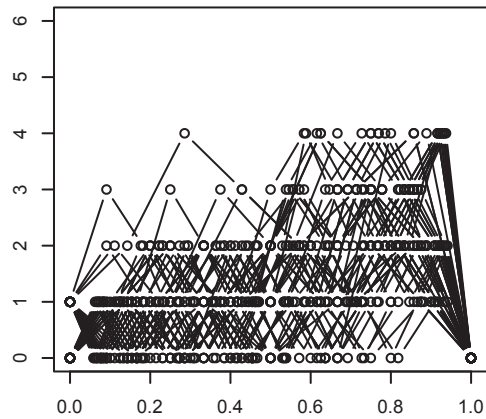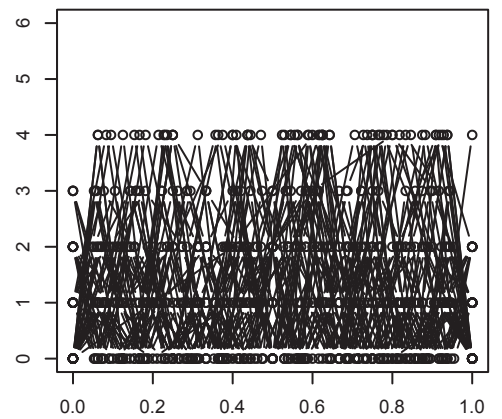

Supplement: NIHMS56469-supplement-Ext_Data_Fig_4.pdf [file NIHMS56469-supplement-Ext_Data_Fig_4.pdf]
