# Supplementary material
Source: PubMed Central journal article supplement (PMC3976272)

Copy number state distribution

Whole chromosome duplication → independent chromothripsis

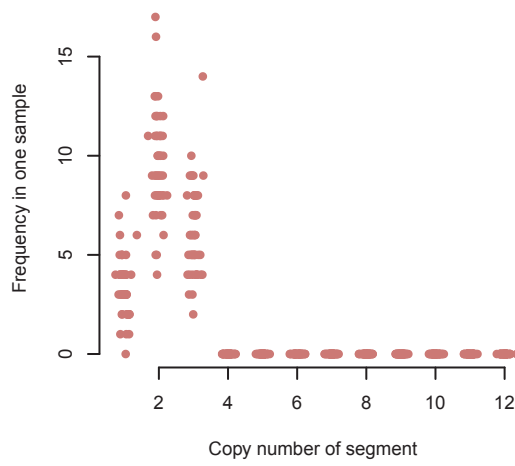

Chromothripsis → 2x tandem duplications

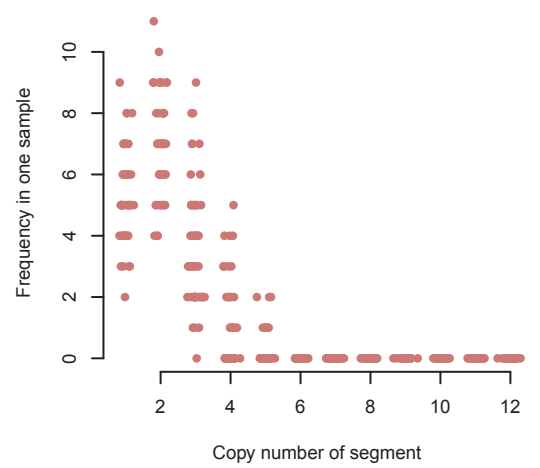

Copy number step size distribution

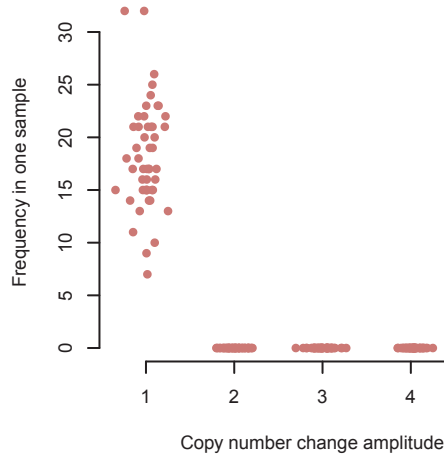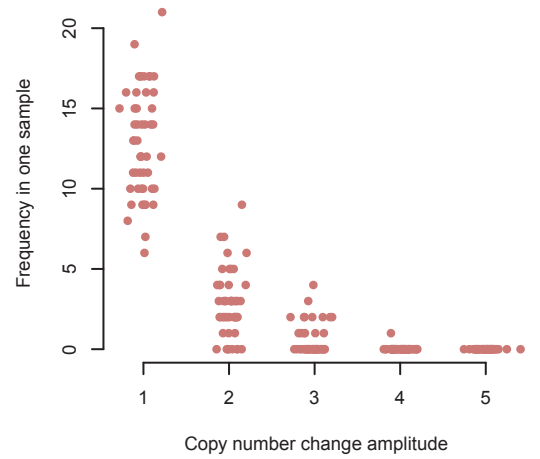

Copy number jump size distribution

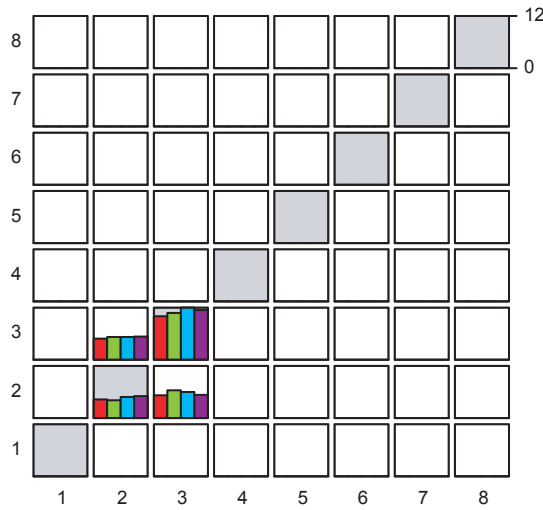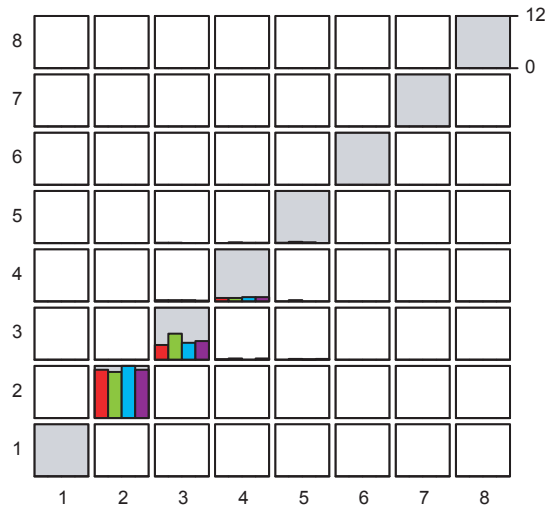

Supplement: NIHMS56469-supplement-Ext_Data_Fig_5.pdf [file NIHMS56469-supplement-Ext_Data_Fig_5.pdf]
