# Supplementary material
Source: PubMed Central journal article supplement (PMC3976272)
Supplement: NIHMS56469-supplement-Ext_Data_Fig_6.pdf [file NIHMS56469-supplement-Ext_Data_Fig_6.pdf]

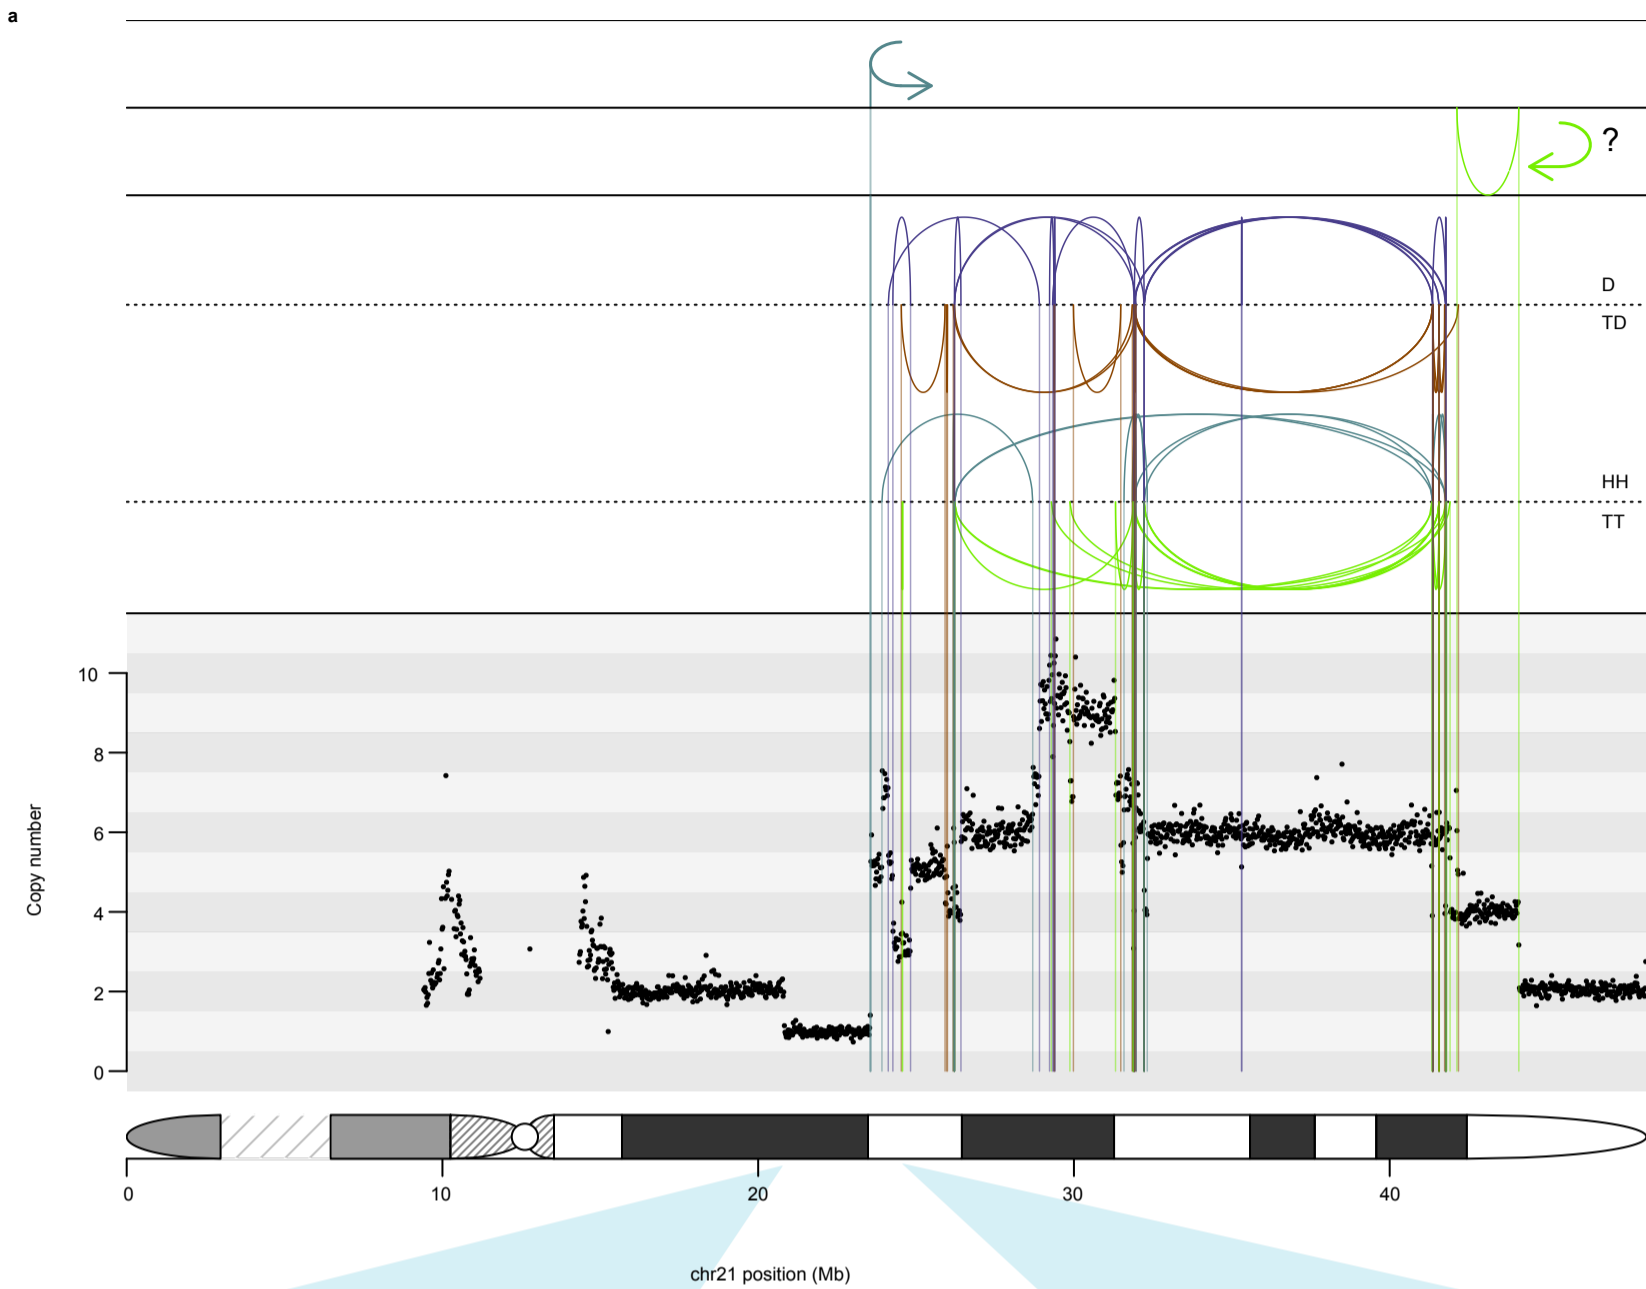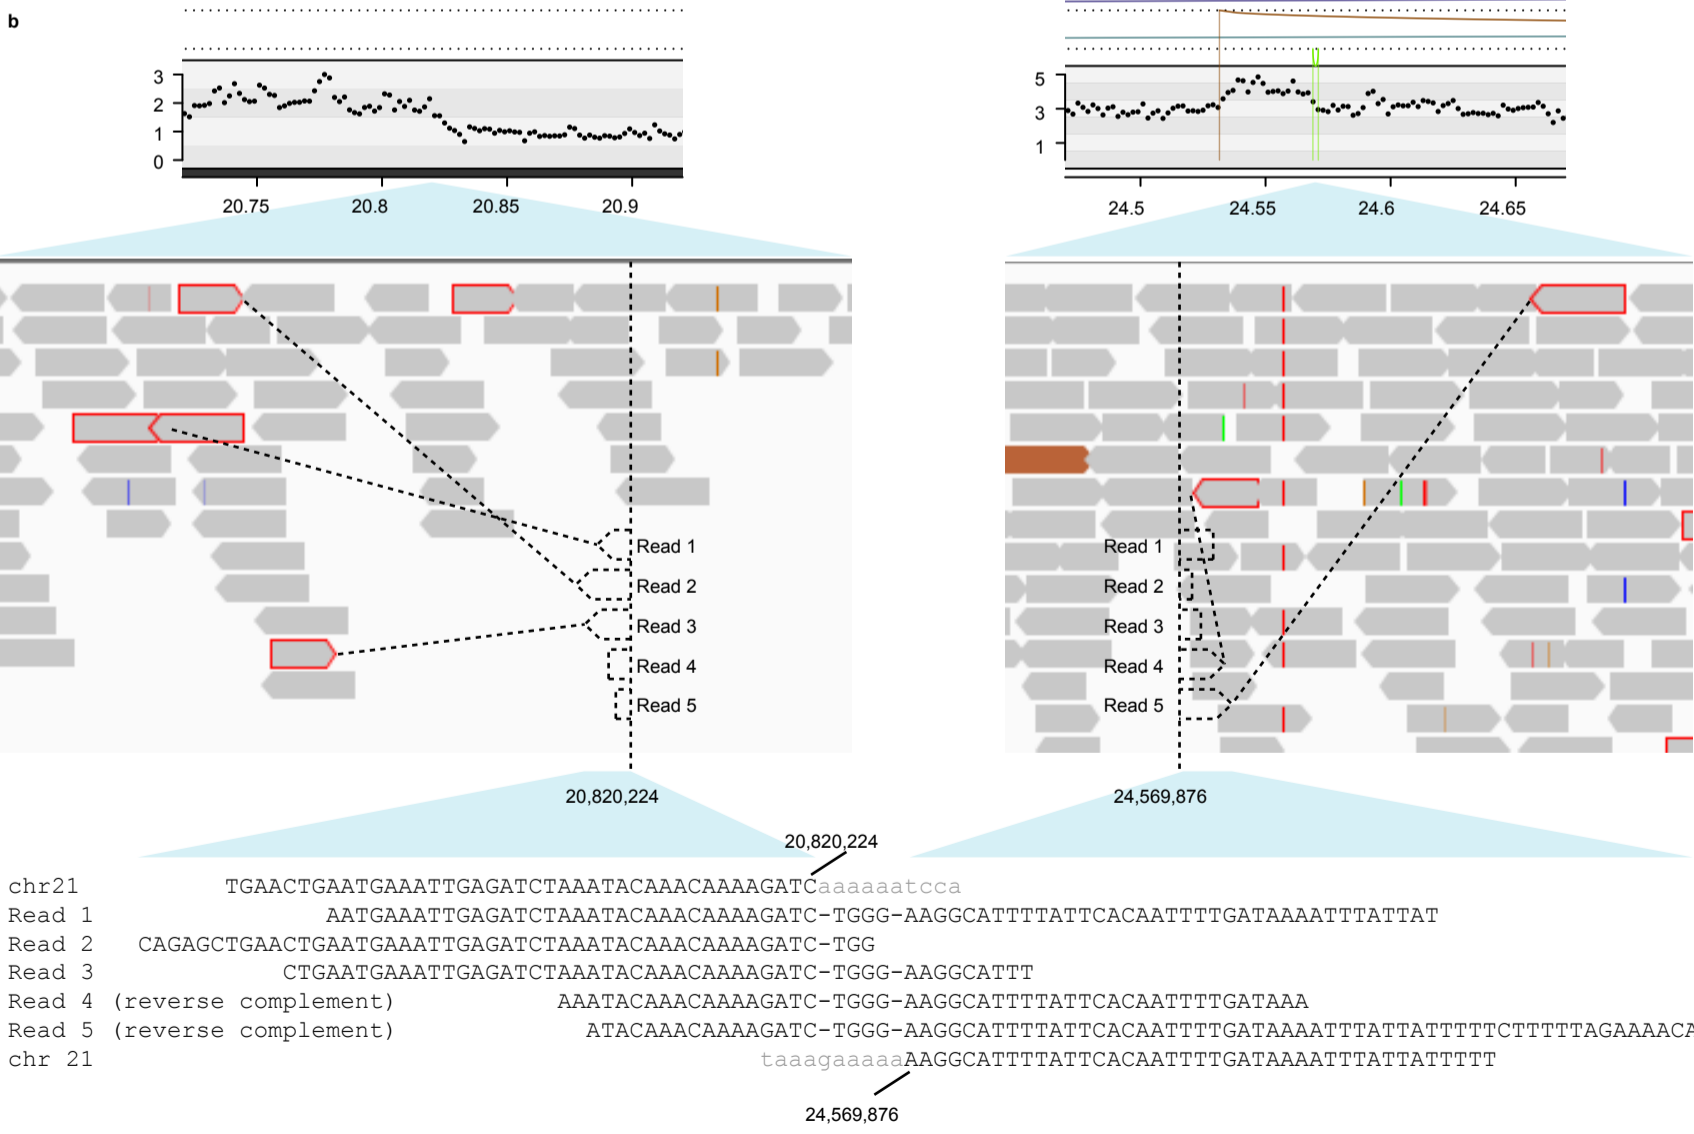

```

chr21      TGAAGTGAATGAAATTGAGATCTAAATACAAACAAAAGATCaaaaaatcca
Read 1     AATGAAATTGAGATCTAAATACAAACAAAAGATC-TGGG-AAGGCATTTTATTCACAATTTTGATAAAATTTATTAT
Read 2     CAGAGCTGAAGTGAATGAAATTGAGATCTAAATACAAACAAAAGATC-TGG
Read 3     CTGAATGAAATTGAGATCTAAATACAAACAAAAGATC-TGGG-AAGGCATTT
Read 4 (reverse complement) AAATACAAACAAAAGATC-TGGG-AAGGCATTTTATTCACAATTTTGATAAA
Read 5 (reverse complement) ATACAAACAAAAGATC-TGGG-AAGGCATTTTATTCACAATTTTGATAAAATTTATTATTTTCTTTTGTAGAAAACA
chr 21     taaagaaaaaAAGGCATTTTATTCACAATTTTGATAAAATTTATTATTTT
  
```
