# Supplementary material
Source: PubMed Central journal article supplement (PMC3976272)

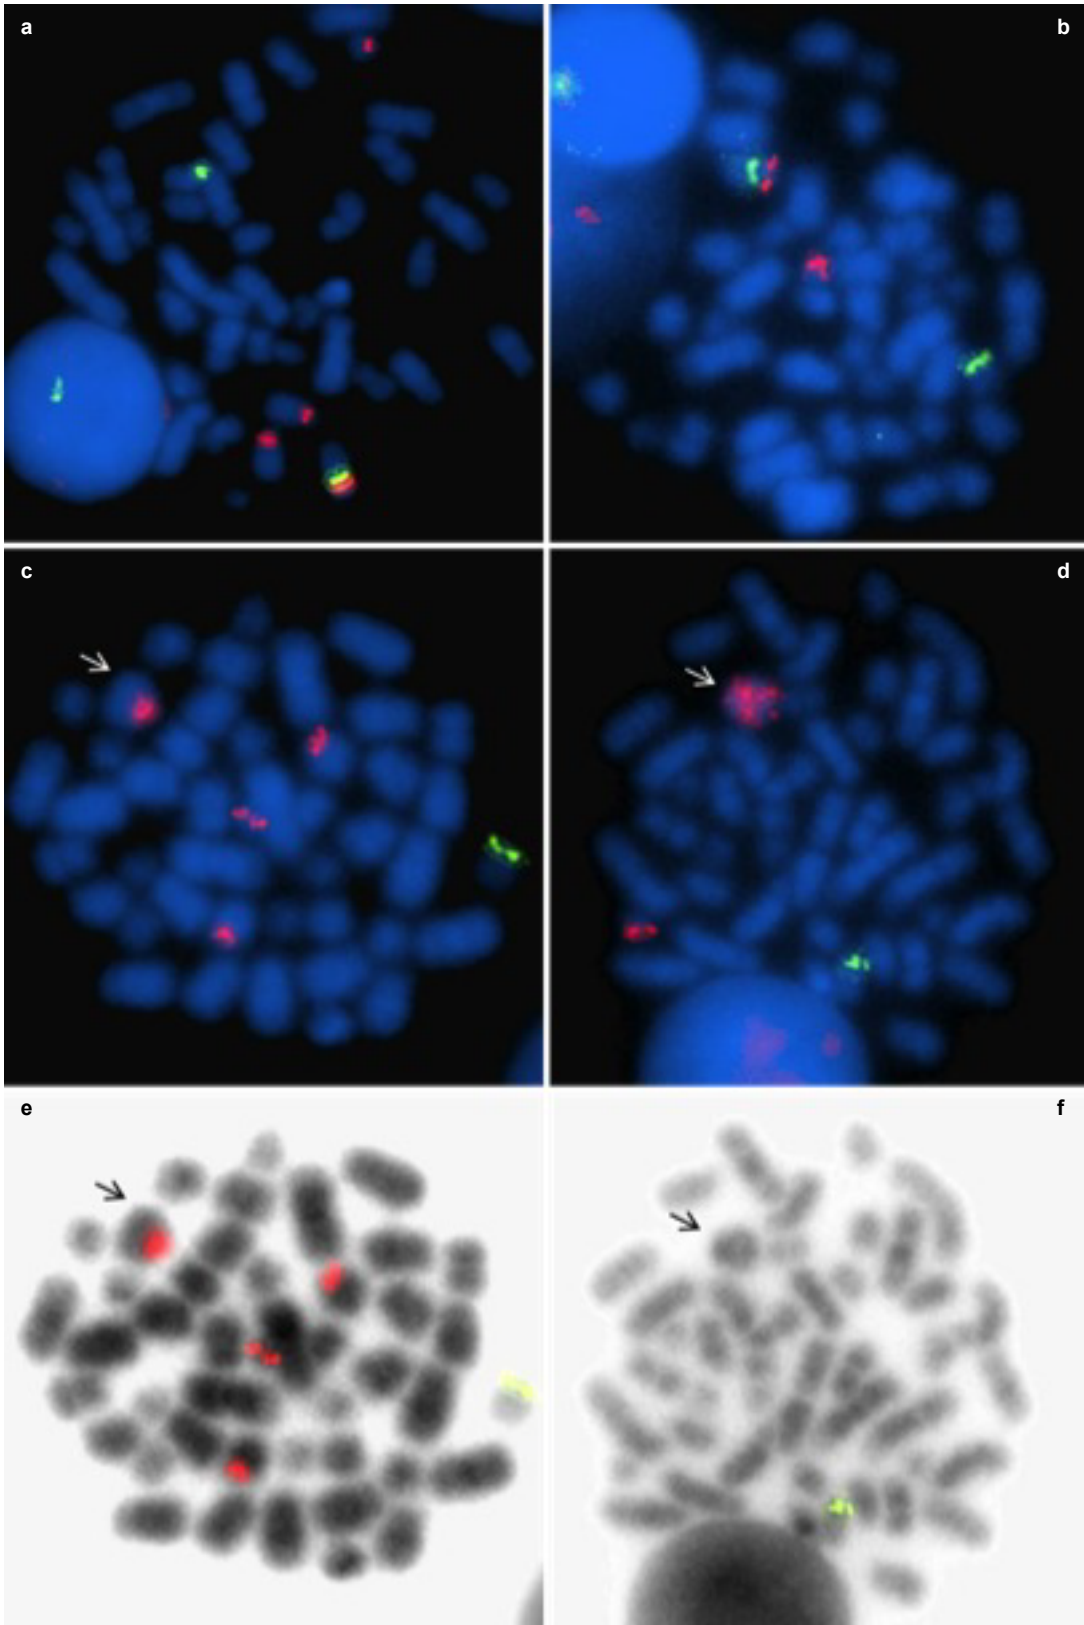

Supplement: NIHMS56469-supplement-Ext_Data_Fig_1.pdf [file NIHMS56469-supplement-Ext_Data_Fig_1.pdf]

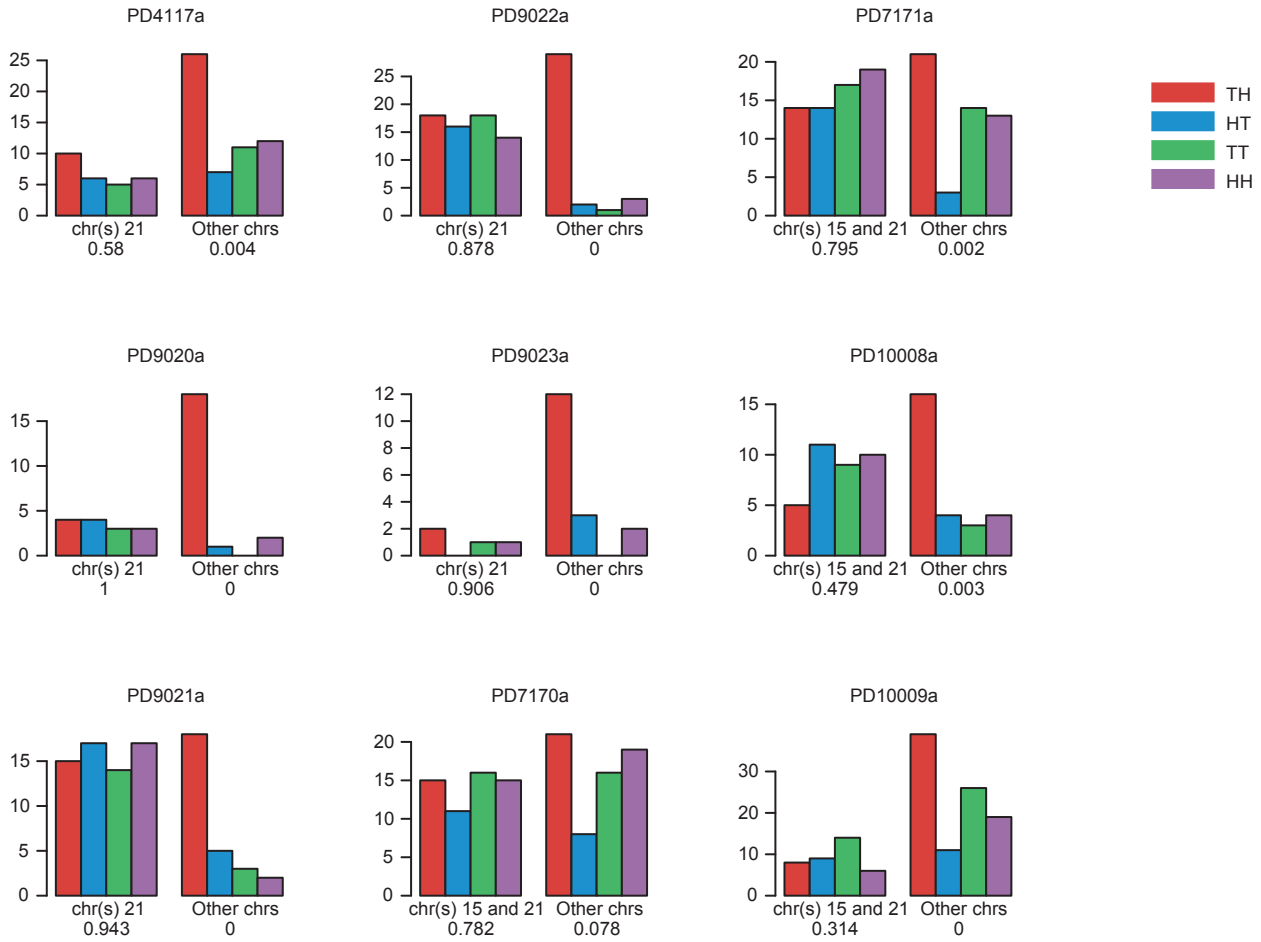

Supplement: NIHMS56469-supplement-Ext_Data_Fig_2.pdf [file NIHMS56469-supplement-Ext_Data_Fig_2.pdf]

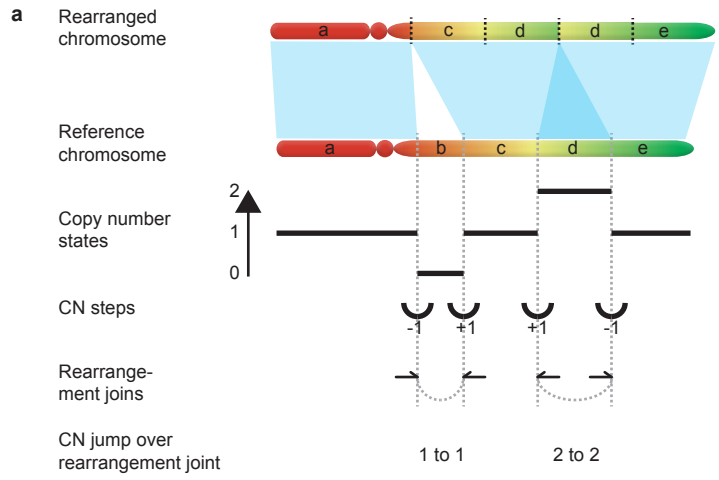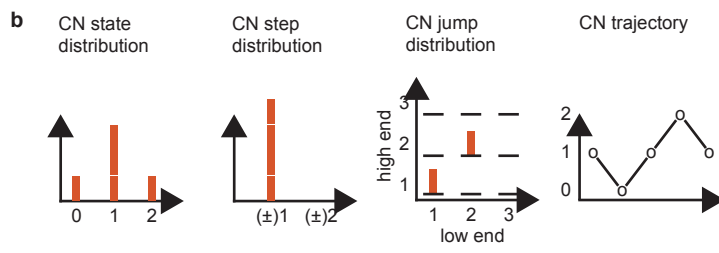

Supplement: NIHMS56469-supplement-Ext_Data_Fig_3.pdf [file NIHMS56469-supplement-Ext_Data_Fig_3.pdf]

**a**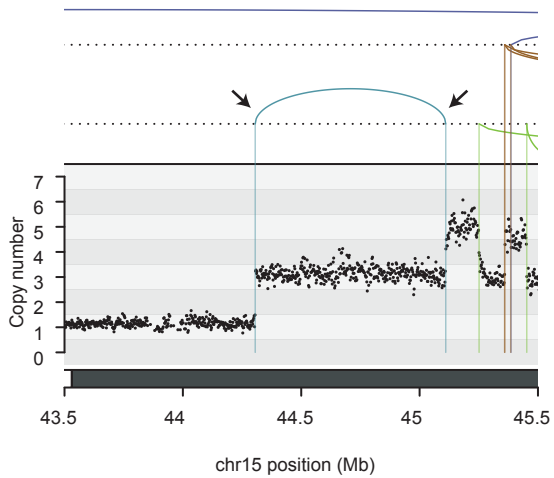**b**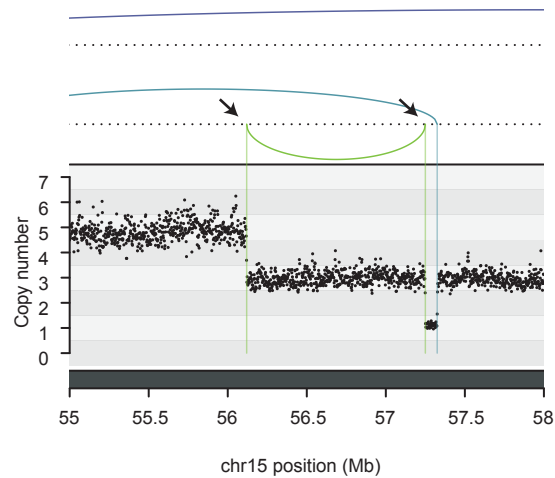**c**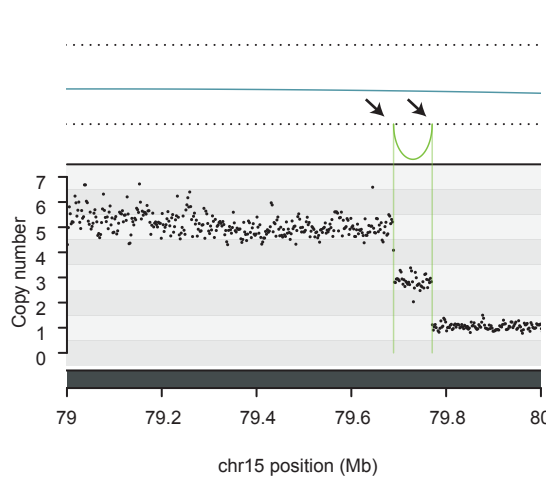

Supplement: NIHMS56469-supplement-Ext_Data_Fig_7.pdf [file NIHMS56469-supplement-Ext_Data_Fig_7.pdf]

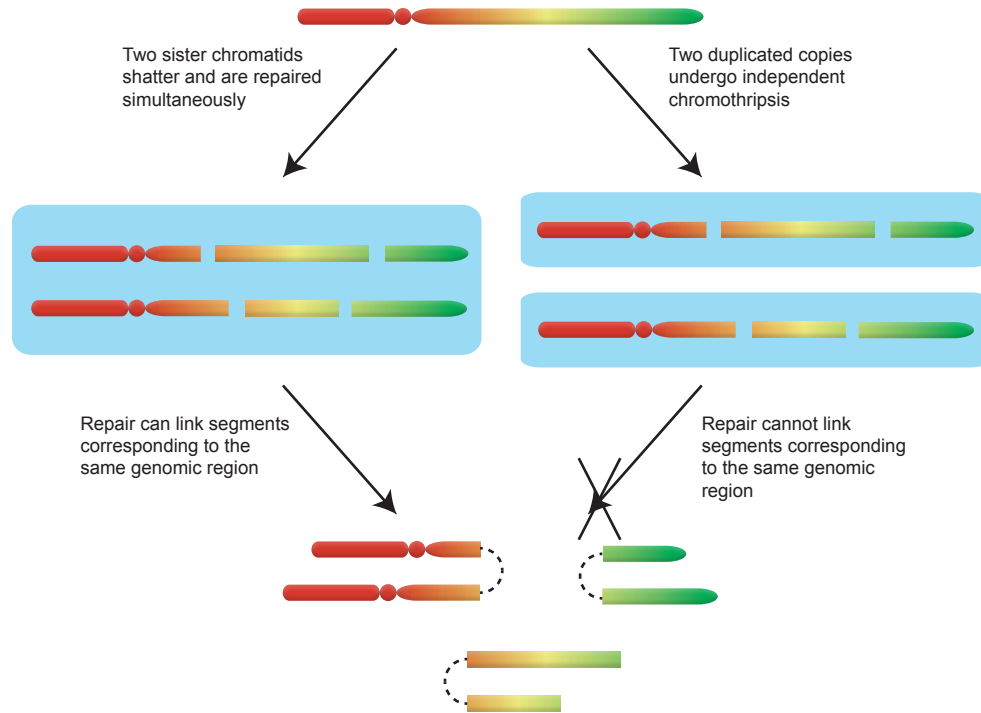

Supplement: NIHMS56469-supplement-Ext_Data_Fig_8.pdf [file NIHMS56469-supplement-Ext_Data_Fig_8.pdf]

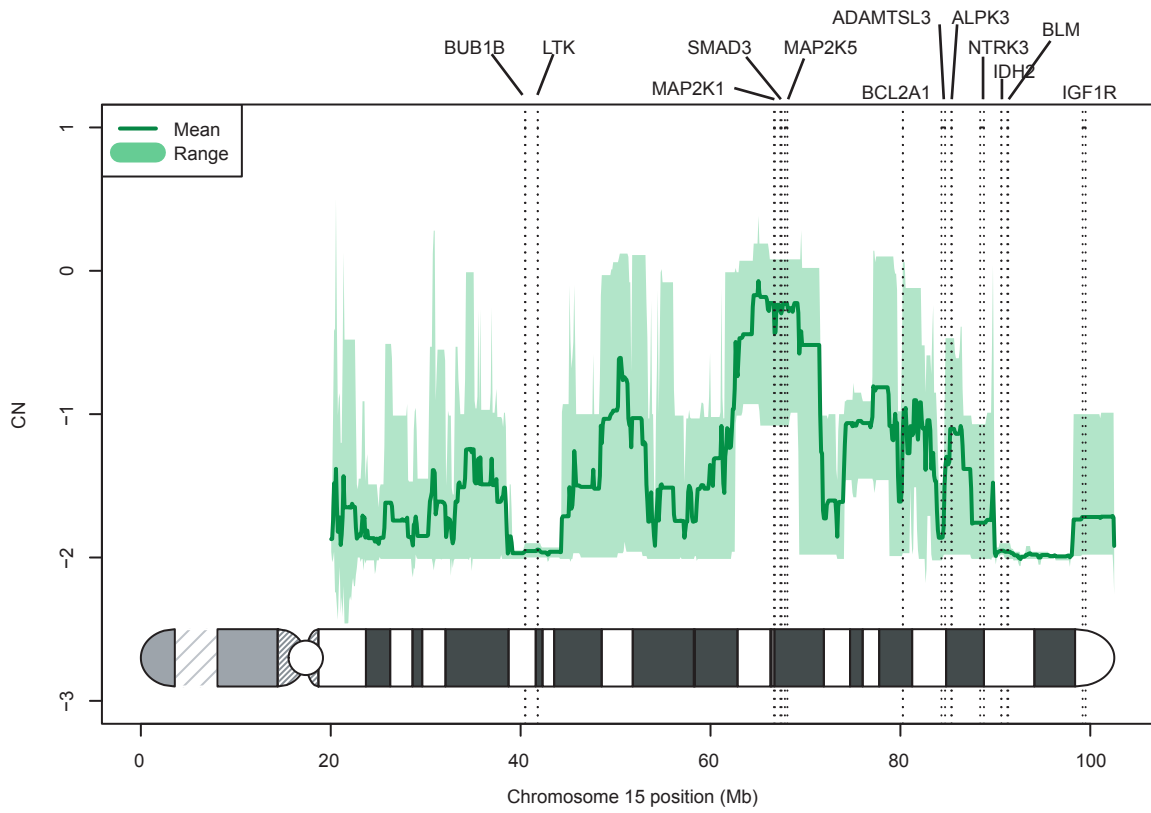

Supplement: NIHMS56469-supplement-Ext_Data_Fig_9.pdf [file NIHMS56469-supplement-Ext_Data_Fig_9.pdf]
